# Supplementary material
Source: PubMed Central journal article supplement (PMC3758371)
Supplement: NIHMS500273-supplement-1.pdf [file NIHMS500273-supplement-1.pdf]

**Passage through the mammalian gut triggers a phenotypic switch that promotes  
*Candida albicans* commensalism**

by Kalyan Pande, Changbin Chen and Suzanne M. Noble

Supplementary Information

Supplementary Figure 1. *WOR1* is required for wild-type commensal fitness

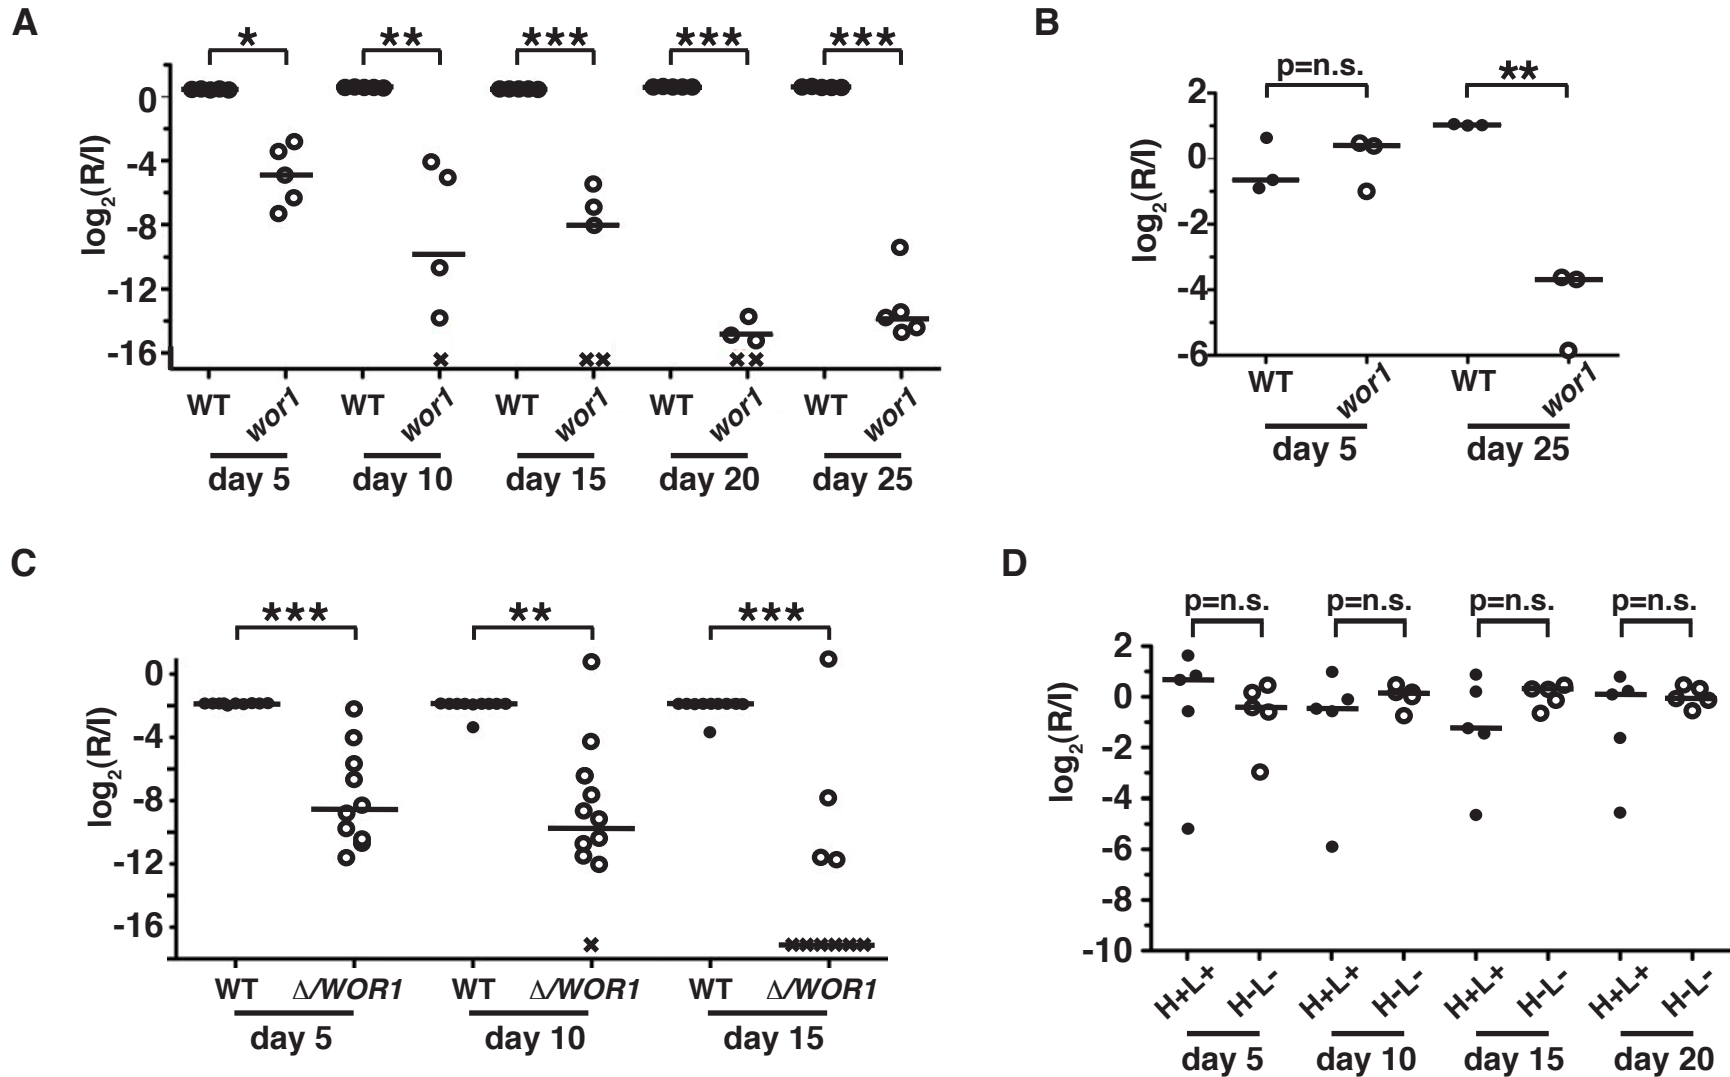

**Legend:** A) and B) Two independent isolates of *wor1* $\Delta\Delta$  are attenuated in the murine commensal model relative to isogenic wild-type strains. These mutants were generated independently from the *wor1* $\Delta\Delta$  isolate tested in Figure 1C. C) A *wor1* $\Delta$ /*WOR1* heterozygous deletion mutant is attenuated for commensalism. Note that the haploinsufficiency phenotype can be complemented by increasing *WOR1* expression from the remaining allele by means of the *TDH3* promoter (*WOR1*<sup>OE</sup> strain, Figure 3A). D) A His-Leu- double auxotroph exhibits wild-type commensalism. Strain designations are: (A) *wor1* $\Delta\Delta$  (SN1064), WT (SN425); B) *wor1* $\Delta\Delta$  (RZY244), WT (QMY23); C) *wor1* $\Delta$ /*WOR1* (SN999), WT (SN235); D) His-Leu- auxotroph (SN87), prototroph (SN425). Significance was determined using the t-test: A) \**p*<0.005, \*\**p*<0.001, \*\*\**p*<0.0001; B) n.s. not significant, \*\**p*<0.002; C) \*\**p*=0.0002, \*\*\**p*<0.0001; D) n.s. not significant.

Supplementary Figure 2. Estimation of *WOR1* gene expression in *MTLa/α* cells

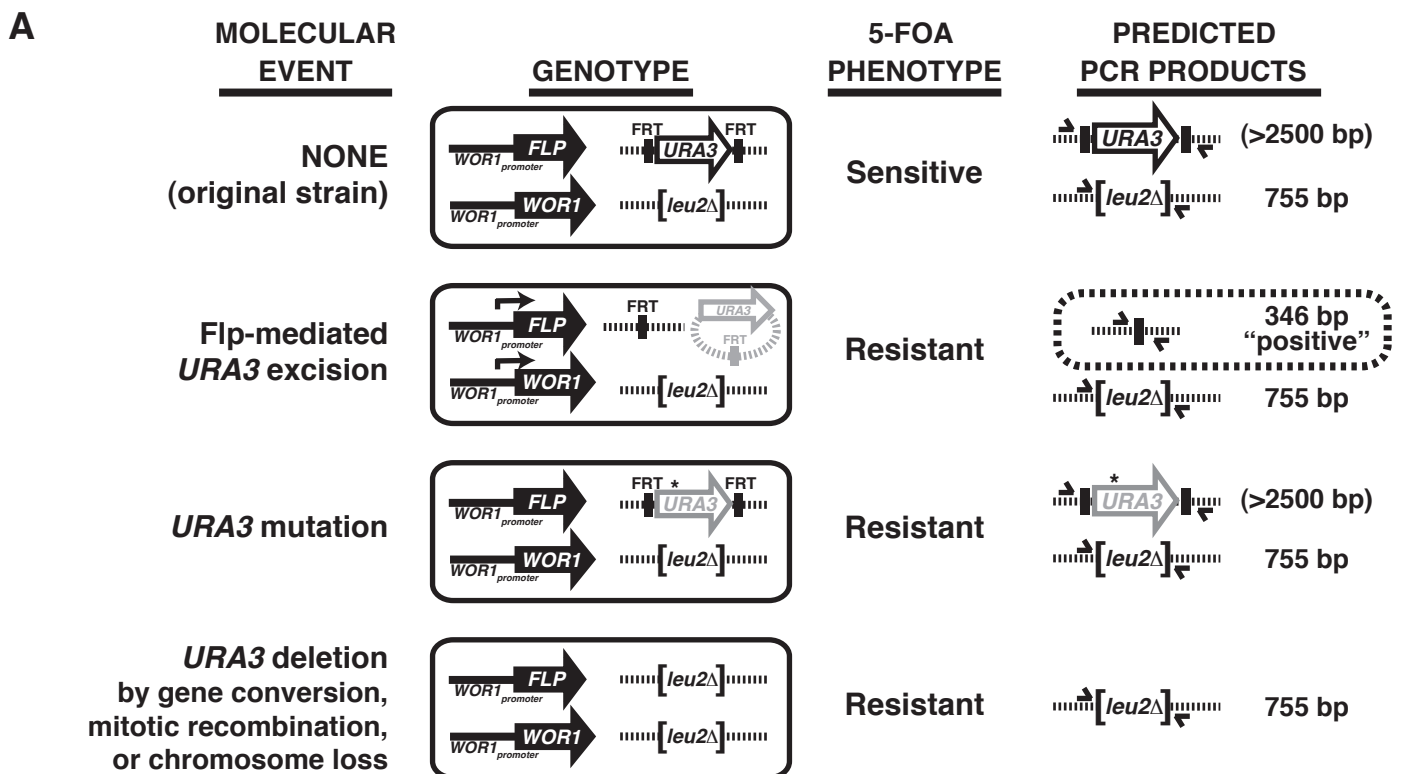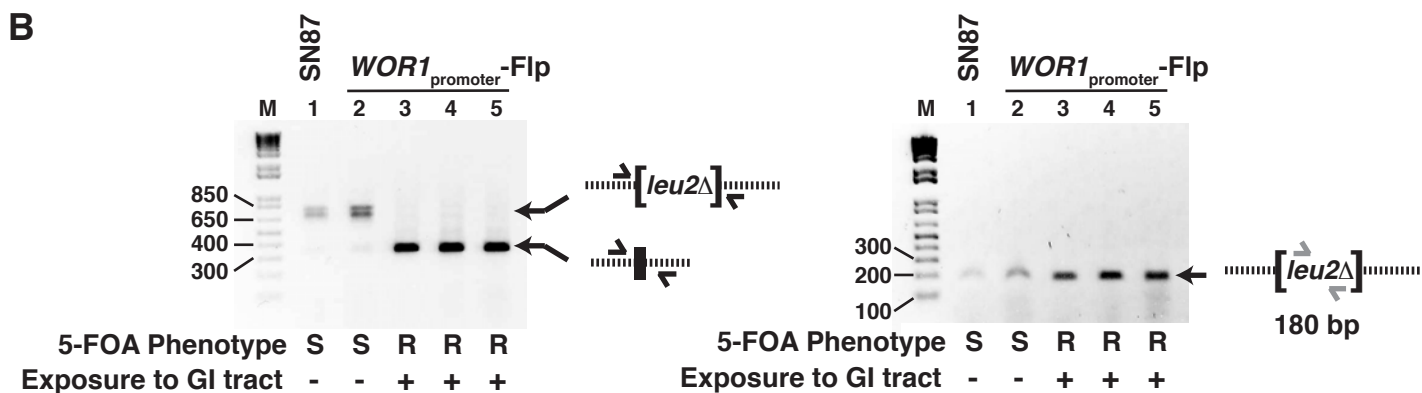

**C**

|                 | # Cells                | # 5-FOA-resistant      | # 5-FOA-resistant, PCR-positive | <i>WOR1</i> expression frequency | Standard deviation |
|-----------------|------------------------|------------------------|---------------------------------|----------------------------------|--------------------|
| <i>in vivo</i>  | 1.60 x 10 <sup>6</sup> | 3.17 x 10 <sup>4</sup> | 3.14 x 10 <sup>4</sup>          | 1.94%                            | 0.55%              |
| <i>in vitro</i> | 1.79 x 10 <sup>6</sup> | 47                     | 4                               | 0.0002%                          | 0.0001%            |

**Supplementary Figure 2 Legend: Estimation of *WOR1* gene expression in *MTLa/α* cells.**

A) Strategy for capturing *WOR1* expression events. The *WOR1*<sub>promoter</sub>-*FLP* strain (SN1020) has the following genotype: *wor1Δ::WOR1*<sub>promoter</sub>-*FLP*/*WOR1*, *leu2Δ::FRT-URA3-FRT/leu2Δ*. Activation of the *WOR1* promoter in this strain results in transcription of *FLP*, followed by Flp-mediated excision of *URA3*, and acquisition of resistance to 5-FOA. Note that 5-FOA-resistance may alternatively arise from mutation of the *URA3* gene or loss of *URA3* through mitotic recombination, gene conversion (via homologous sequences on the other copy of Chromosome 7), or chromosome loss. Colony PCR is performed to screen for products of Flp-mediated recombination, which generate a unique 346 bp product (“positive” test). B) Representative PCR results. On the left, PCR for Flp-mediated events is shown for SN87 (lane 1), the reference strain used to construct *WOR1*<sub>promoter</sub>-*FLP*; the *WOR1*<sub>promoter</sub>-*FLP* starting strain (lane 2); and three 5-FOA-resistant isolates of *WOR1*<sub>promoter</sub>-*FLP* (lanes 3-5) that were recovered from animals. Note that the trans-FRT reaction in Flp-recombinant strains outcompetes the trans-*leu2Δ* reaction, such that only the 346 bp product is apparent in lanes 3-5. On the right, PCR using primers internal to the *leu2Δ* locus confirms that all five strains retain this locus. C) Frequency of Flp-mediated *URA3* excision *in vivo* and *in vitro*. The *WOR1*<sub>promoter</sub>-*FLP* strain was propagated for three days in the commensal model (n=6 mice) or for 8 generations *in vitro* at 37°C (n=4 cultures). The frequency of cells expressing *WOR1* propagated under a given condition was estimated from the ratio of (5-FOA<sup>R</sup>, PCR-positive colonies) / (total number of colonies). Diagnostic PCR was performed on 288 of the 31,700 5-FOA-resistant isolates recovered from mice and on all 47 5-FOA-resistant isolates obtained *in vitro*. 277/278 *in vivo* strains and 4/47 *in vitro* strains tested positive for the 346 bp marker of Flp-mediated recombination. Average values with standard deviations were plotted.

### Supplementary Figure 3. Characterization of the *WOR1*<sup>OE</sup> strain

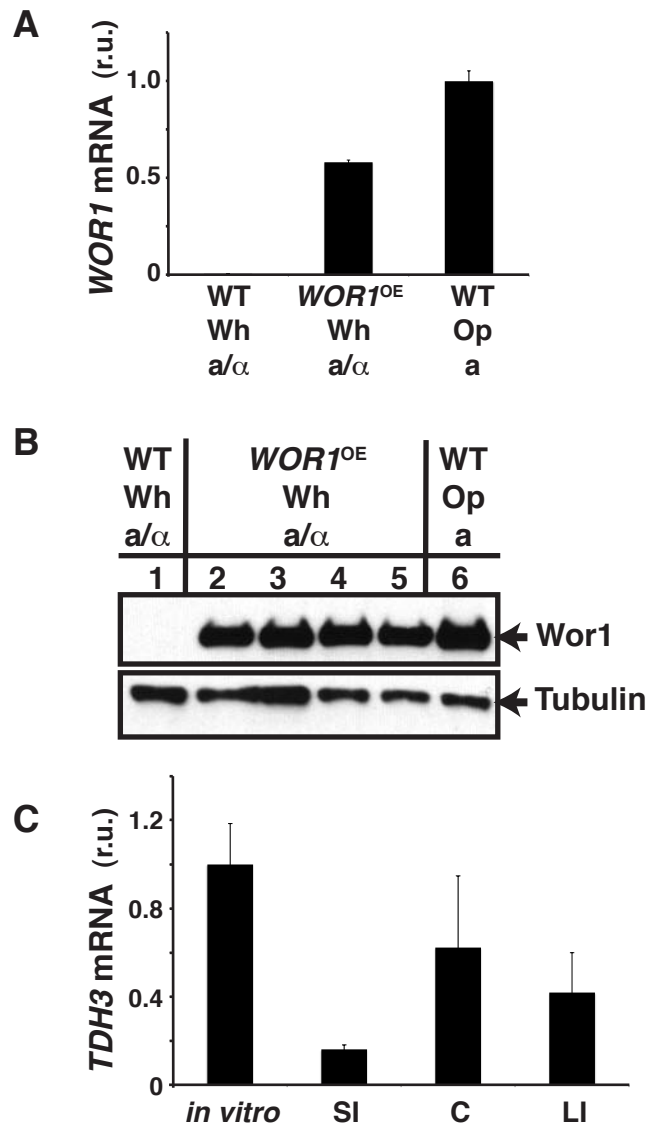

**Legend:** A) *WOR1* mRNA is highly expressed in the *WOR1*<sup>OE</sup> (*TDH3*<sub>promoter</sub>-*WOR1*) strain. RT-qPCR was performed on three biological replicates each of wild-type white (*MTLa/a*, SN425), *WOR1*<sup>OE</sup> white (*MTLa/a*, SN928), and opaque (*MTLa*, SN967) strains. Median values are shown, along with standard deviations. Relative to its expression in WT cells, *WOR1* is induced 102-fold in the *WOR1*<sup>OE</sup> strain and 175-fold in opaque cells. B) *Wor1* protein is highly expressed in the *WOR1*-overexpression strain. Immunoblot of *Wor1* protein prepared from wild-type white (*MTLa/a*, SN425), *WOR1*<sup>OE</sup> white (*MTLa/a*, SN828 and three additional isolates), and opaque (*MTLa*, SN967) strains. C) In the mammalian GI tract, the *TDH3* promoter is active but not induced relative to *in vitro*. RT-qPCR of mRNA from wild-type white cells (*MTLa/a*, SN425) after 8 doublings in liquid YEPD medium at 37°C (*in vitro*) or directly recovered from small intestines (SI), ceca, or large intestines (LI) after 10 days in the murine commensal model. Medians with standard deviations are shown for 5 (laboratory culture) or 3 (commensalism model) biological replicates.

**Supplementary Figure 4. *MTLa/α* GUT cells display an early fitness advantage in the mammalian GI tract, but are less fit in laboratory culture and in blood-stream infection**

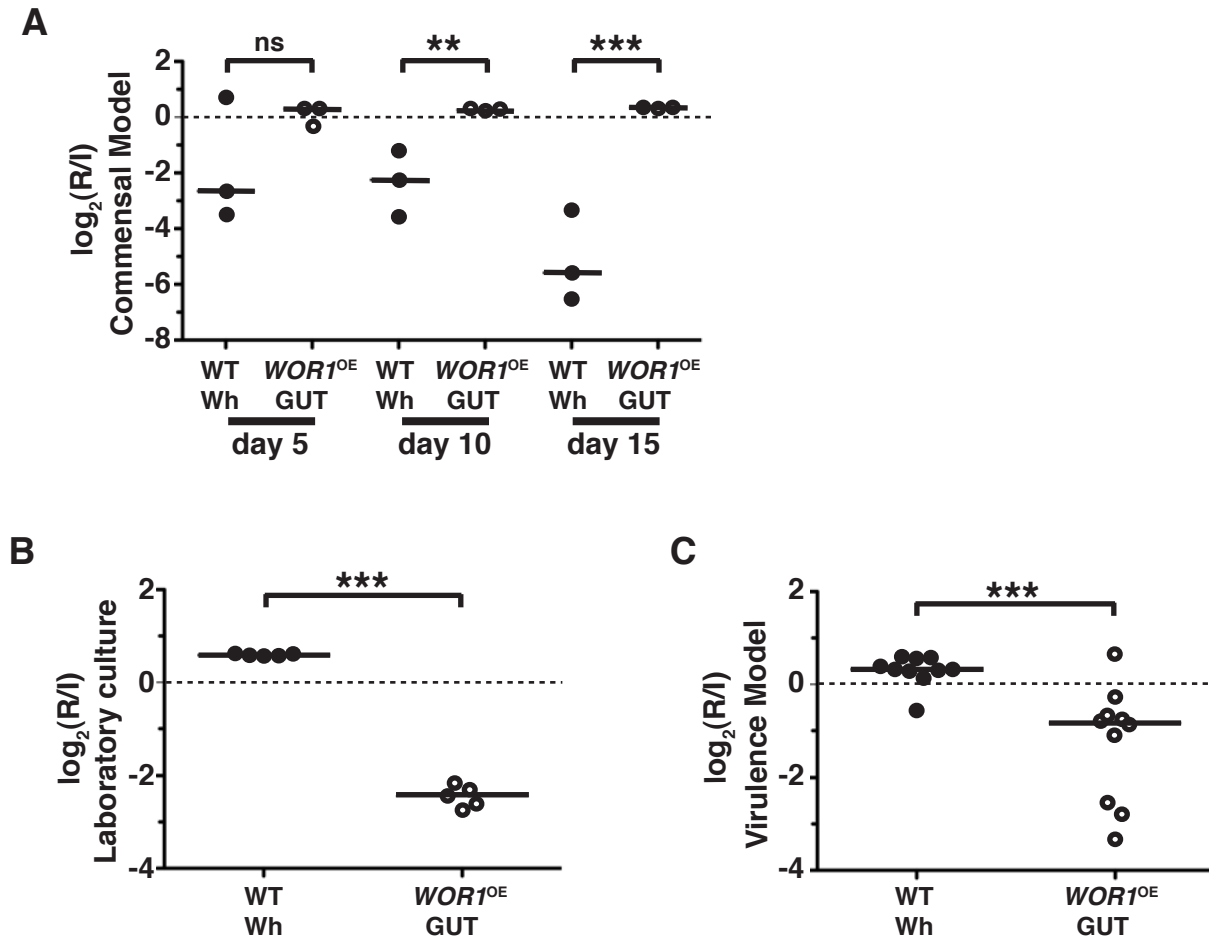

**Legend:** A) Commensal competition experiment between WT *MTLa/α* white cells (SN425) and *WOR1<sup>OE</sup> MTLα/α* GUT cells (SN1045). Note that, in contrast to the case with white phase *WOR1<sup>OE</sup>* (Figure 2A), GUT phase cells are highly competitive from the beginning of the time course. ns nonsignificant, \*\* p<0.02, \*\*\* p<0.005. B) *in vitro* competition between the same two strains. Strains were co-cultured for 8 generations in liquid YEPD medium at 37°C. Relative abundances of strains at the beginning (I) and end (R) of the time course were determined by qPCR. \*\*\* p<0.0001. C) Competition between the same two strains in a murine model of disseminated disease. Strains were co-infected into BALB/c mice via lateral tail vein, *C. albicans* was recovered from kidneys of moribund animals after a median of 5 days post infection (range 4 to 6 days), and relative abundances in the inoculum (I) and after recovery from kidneys (R) was determined by qPCR.

**Supplementary Figure 5. Additional phenotypes of GUT and white cells**

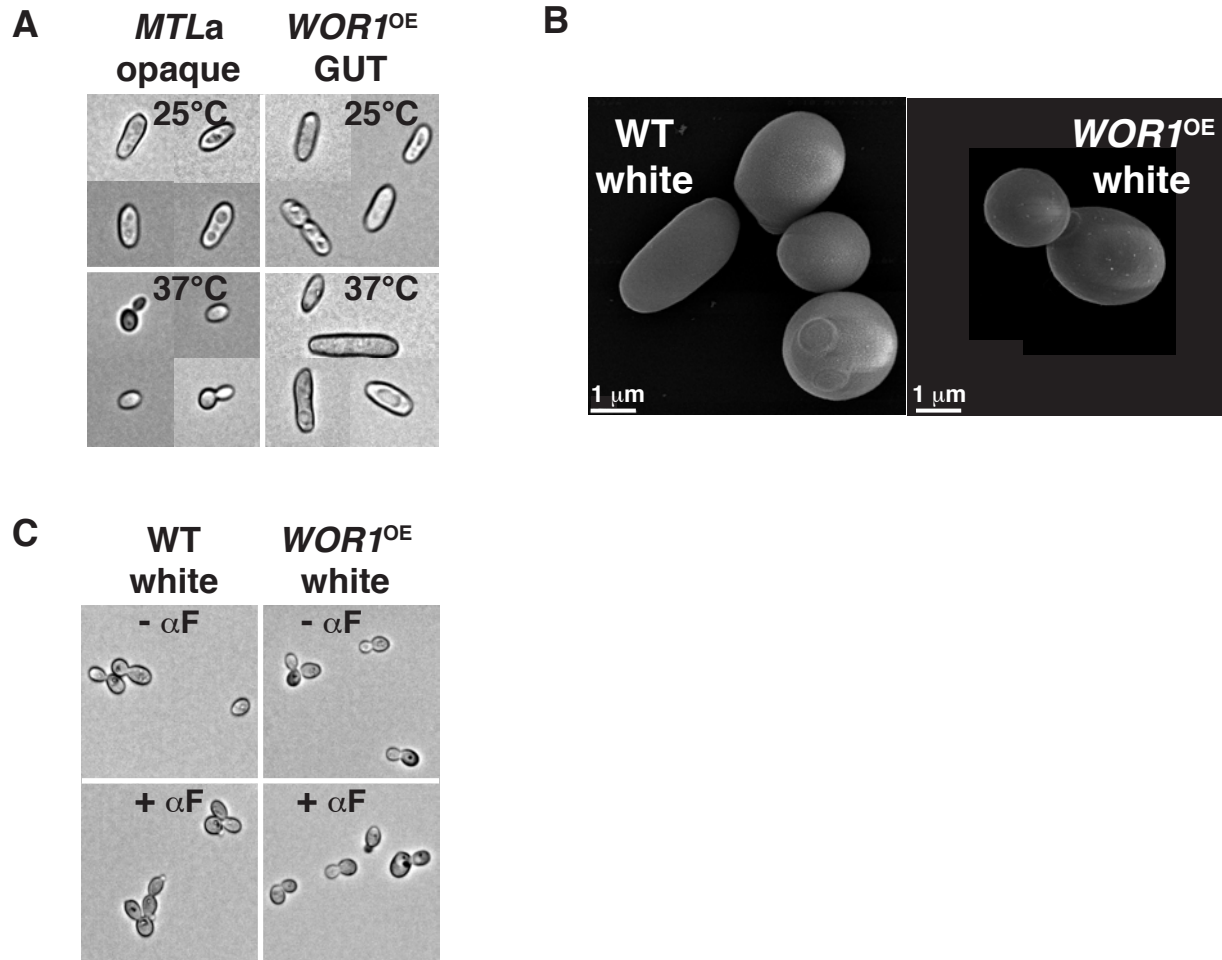

**Legend:** A) The GUT phenotype is stable at 37°C. After 3 days of incubation on YEPD medium at room temperature (~25°C) or 37°C, *MTLa/α* GUT (SN1045) and *MTLa* opaque (SN967) cells were visualized by light microscopy. B) SEM images of white phase WT (SN425) and *WOR1<sup>OE</sup>* (SN928) cells, which lack pimple structures. C) White phase *MTLa* (SN966) and *WOR1<sup>OE</sup>* (SN1044) strains fail to produce germ tubes in response to mating pheromone.

## Supplementary Figure 6. Model of phenotypic switching in the host

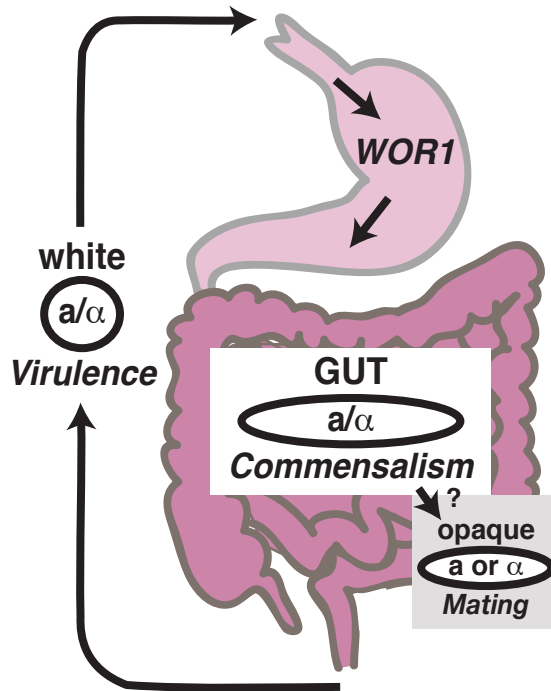

**Legend:** According to this model, *MTLa/α* white cells exposed to the mammalian GI tract encounter signals triggering *WOR1* expression and a shift to the GUT state, which is specialized for commensalism. GUT cells exiting this space rapidly convert back to the white state, which is virulent. Additional signals may alternatively trigger GUT cells to undergo loss of one allele of *MTL* (e.g. through loss of Chromosome 5) and conversion to the sexually-competent opaque state.



# Supplementary Figure 7

**A** WT vs. *efg1* $\Delta\Delta$  commensalism

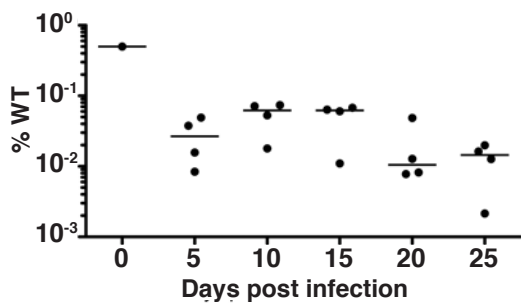

**B** WT vs. *wor1* $\Delta\Delta$  commensalism

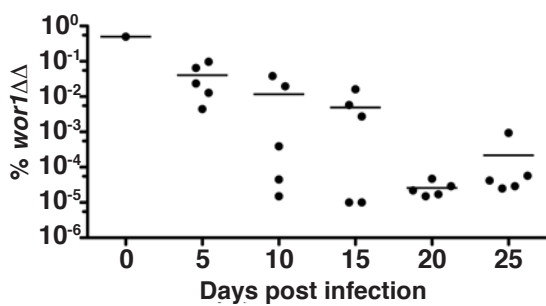

**C** WT vs. *WOR1*<sup>OE</sup> commensalism

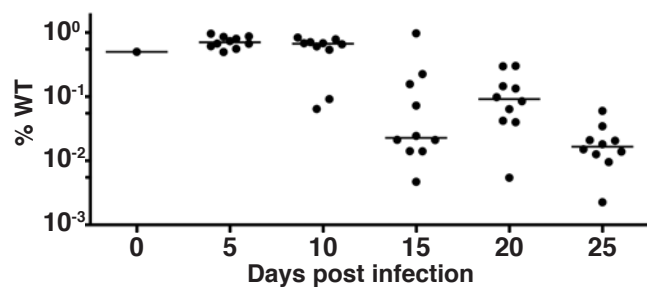

**D** WT vs. opaque commensalism

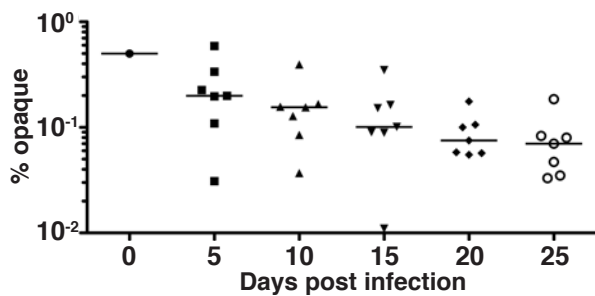

**E** WT vs. *wor1* $\Delta\Delta$  commensalism

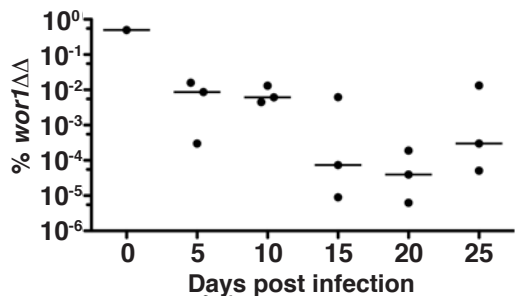

**F** WT vs. *wor1* $\Delta\Delta$  commensalism

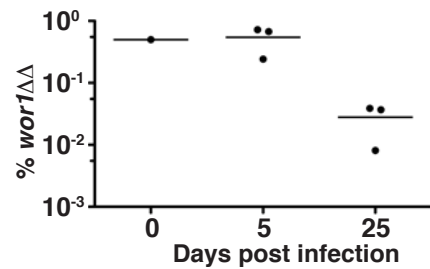

**G** WT vs. *wor1* $\Delta$ /*WOR1* commensalism

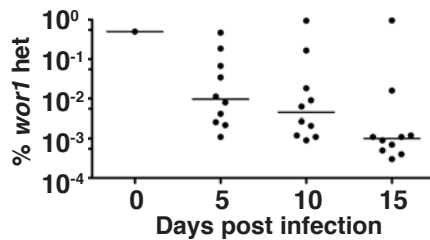

**H** His<sup>-</sup>Leu<sup>-</sup>Auxotroph vs. Prototroph commensalism

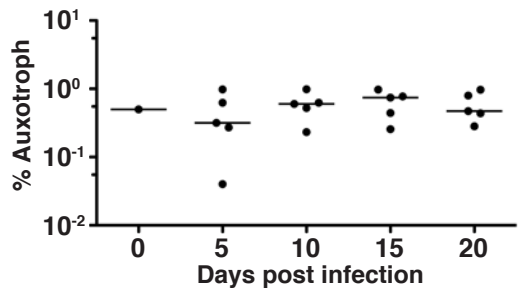

**I** WT vs. GUT commensalism

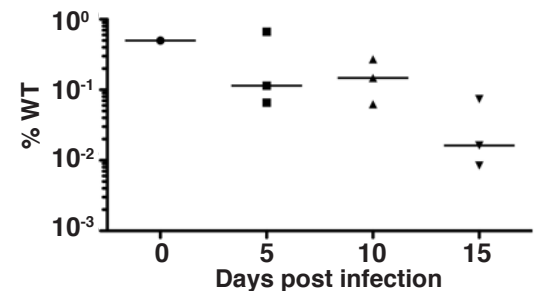

**J** WT vs. GUT *in vitro*

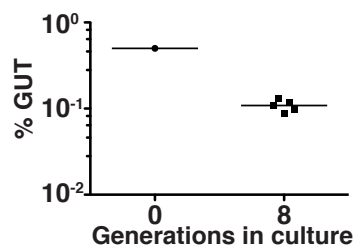

**K** WT vs. GUT disseminated infection

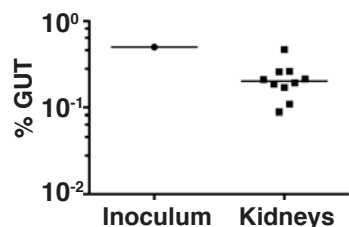

**Supplementary Figure 7 Legend: Competition experiments in “% abundance of the less fit strain” format.** A) WT (SN250) is outcompeted by *efg1ΔΔ* (SN1011) in the murine commensal model. Plot is derived from the same data as depicted in **Figure 1A**. B) *wor1ΔΔ* (SN881) is outcompeted by WT (SN250) in the murine commensal model. Plot is derived from the same data as depicted in **Figure 1C**. C) WT (SN425) is outcompeted by *WOR1OE* (SN928) in the murine commensal model. Plot is derived from the same data as depicted in **Figure 2A**. D) Opaque cells (SN967) are outcompeted by WT white cells (SN425) in the murine commensal model. Plot is derived from the same data as depicted in **Figure 3C**. E) *wor1ΔΔ* (SN1064) is outcompeted by WT (SN425) in the murine commensal model. Plot is derived from the same data as depicted in **Supplementary Figure 1A**. F) *wor1ΔΔ* (RZY244) is outcompeted by WT (QMY23) in the murine commensal model. Plot is derived from the same data as depicted in **Supplementary Figure 1B**. G) *wor1Δ/WOR1* heterozygous knockout (SN999) is outcompeted by WT (SN235) in the murine commensal model. Plot is derived from the same data as depicted in **Supplementary Figure 1C**. H) A His-Leu- double auxotroph (SN87) is as fit as a prototroph (SN425) in the murine commensal model. Plot is derived from the same data as depicted in **Supplementary Figure 1D**. I) White phase WT (SN425) is outcompeted by GUT cells (SN1045) in the murine commensal model. Plot is derived from the same data as depicted in **Supplementary Figure 4A**. J) GUT cells (SN1045) are outcompeted by white phase WT (SN425) in liquid culture medium. Plot is derived from the same data as depicted in **Supplementary Figure 4B**. K) GUT cells (SN1045) are outcompeted by white phase WT (SN425) in a murine model of disseminated candidiasis. Plot is derived from the same data as depicted in **Supplementary Figure 4C**.

**Supplementary Table 1. *MTLa* and *MTL $\alpha$*  Genotypes of White and GUT Cells After Recovery from the Murine Commensal Model**

| Experiment | Phenotype | <i>MTLa</i> present | <i>MTL<math>\alpha</math></i> present | Colonies analyzed | % <i>MTLa</i> / $\alpha$ |
|------------|-----------|---------------------|---------------------------------------|-------------------|--------------------------|
| 1          | white     | 44                  | 44                                    | 44                | 100                      |
| 1          | GUT       | 32                  | 40                                    | 40                | 80                       |
| 2          | white     | 53                  | 52                                    | 53                | 98                       |
| 2          | GUT       | 7                   | 8                                     | 8                 | 88                       |
| 3          | white     | 24                  | 24                                    | 24                | 100                      |
| 3          | GUT       | 24                  | 24                                    | 24                | 100                      |
| 4          | white     | 24                  | 24                                    | 24                | 100                      |
| 4          | GUT       | 24                  | 24                                    | 24                | 100                      |
| Total      | white     | 145                 | 144                                   | 145               | 99                       |
| Total      | GUT       | 87                  | 96                                    | 96                | 91                       |

**Supplementary Table 2. Mating Efficiencies of Various Strains**

| Cross | Strain and Phase                                          |                                                  | Mating Efficiency<br>(His <sup>+</sup> Arg <sup>+</sup> /His <sup>+</sup> Arg <sup>-</sup> ) |                        |                        |
|-------|-----------------------------------------------------------|--------------------------------------------------|----------------------------------------------------------------------------------------------|------------------------|------------------------|
|       | Strain 1<br>(His <sup>+</sup> Arg <sup>-</sup> )          | Strain 2 (His <sup>-</sup><br>Arg <sup>+</sup> ) | 3 days                                                                                       | 5 days                 | 13 Days                |
| 1     | <i>MTL<math>\alpha</math></i> opaque                      | <i>MTLa</i> opaque                               | 3.3 x 10 <sup>-1</sup>                                                                       | 8.0 x 10 <sup>-1</sup> | 1.5 x 10 <sup>-1</sup> |
| 2     | <i>MTLa</i> / $\alpha$ white                              | <i>MTLa</i> opaque                               | <6 x 10 <sup>-7</sup>                                                                        | <2 x 10 <sup>-7</sup>  | <1 x 10 <sup>-7</sup>  |
| 3     | <i>WOR1</i> <sup>OE</sup><br><i>MTLa</i> / $\alpha$ white | <i>MTLa</i> opaque                               | 4.6 x 10 <sup>-6</sup>                                                                       | 4.2 x 10 <sup>-6</sup> | 5.7 x 10 <sup>-6</sup> |
| 4     | <i>WOR1</i> <sup>OE</sup><br><i>MTLa</i> / $\alpha$ GUT   | <i>MTLa</i> opaque                               | <2 x 10 <sup>-7</sup>                                                                        | <3 x 10 <sup>-7</sup>  | <2 x 10 <sup>-7</sup>  |

**Supplementary Table 4. Regulated Genes Sets in GUT and opaque cells**

| Gene Name<br>Standard Name                             | Description of Gene<br>Product                                                          | Cellular<br>Process  | Reported<br>Specificity<br>(Wh vs. Op) |                 |                | RNA Expression Level |                   |                    |                   |                   | Relative<br>Expression |              |             |
|--------------------------------------------------------|-----------------------------------------------------------------------------------------|----------------------|----------------------------------------|-----------------|----------------|----------------------|-------------------|--------------------|-------------------|-------------------|------------------------|--------------|-------------|
|                                                        |                                                                                         |                      | Lan<br>et al.                          | Tsong<br>et al. | Tuch<br>et al. | WT<br>Wh             | <i>WOR1</i><br>Wh | <i>WOR1</i><br>GUT | <i>MTLa</i><br>Wh | <i>MTLa</i><br>Op | GUT/<br>Wh             | Op/<br>Wh    | GUT/<br>Op  |
| <b>UPREGULATED IN GUT AND OPAQUE (VS. WH CONTROLS)</b> |                                                                                         |                      |                                        |                 |                |                      |                   |                    |                   |                   |                        |              |             |
| <b><i>PXP2</i></b><br><i>orf19.1655</i>                | Putative acyl-CoA oxidase                                                               | Lipid<br>Utilization | Op                                     | Op              | Op             | 1.7                  | 7.6               | 30.0               | 1.0               | 47.7              | <b>17.8*</b>           | <b>47.7*</b> | 0.6         |
| <b><i>ANT1</i></b><br><i>orf19.6254</i>                | Putative adenine nucleotide<br>transmembrane transporter                                | Lipid<br>Utilization | Op                                     | Op              | Op             | 1.1                  | 2.7               | 6.8                | 1.0               | 5.7               | <b>6.4*</b>            | <b>5.7*</b>  | 1.2         |
| <b><i>FOX2</i></b><br><i>orf19.1288</i>                | 3-hydroxyacyl-CoA epimerase                                                             | Lipid<br>Utilization | Op                                     |                 |                | 1.2                  | 3.3               | 5.0                | 1.0               | 6.1               | <b>4.1*</b>            | <b>6.1*</b>  | 0.8         |
| <b><i>POX1</i></b><br><i>orf19.5723</i>                | Putative acyl-CoA oxidase                                                               | Lipid<br>Utilization | Op                                     |                 | Op             | 1.1                  | 2.2               | 4.1                | 1.0               | 5.0               | <b>3.9*</b>            | <b>5.0*</b>  | 0.8         |
| <b><i>ECI1</i></b><br><i>orf19.6445</i>                | Ortholog of <i>S. cerevisiae</i> Eci1p,<br>which is involved in fatty acid<br>oxidation | Lipid<br>Utilization |                                        |                 | Op             | 1.1                  | 2.2               | 3.1                | 1.0               | 5.2               | <b>2.9*</b>            | <b>5.2*</b>  | <b>0.6*</b> |
| <b><i>POX1-3</i></b><br><i>orf19.1652</i>              | Putative acyl-CoA oxidase                                                               | Lipid<br>Utilization |                                        |                 |                | 1.0                  | 1.8               | 3.9                | 1.0               | 3.1               | <b>3.8*</b>            | <b>3.1*</b>  | 1.3         |
| <b><i>CAT2</i></b><br><i>orf19.4591</i>                | Major carnitine acetyl transferase                                                      | Lipid<br>Utilization |                                        | Op              |                | 1.1                  | 1.8               | 2.5                | 1.0               | 2.6               | <b>2.2*</b>            | <b>2.6*</b>  | 0.9         |
| <b><i>POT1</i></b><br><i>orf19.7520</i>                | Putative peroxisomal 3-oxoacyl<br>CoA thiolase                                          | Lipid<br>Utilization |                                        |                 |                | 1.0                  | 1.9               | 2.8                | 1.0               | 2.7               | <b>2.7*</b>            | <b>2.7*</b>  | 1.1         |
| <b><i>SPS20</i></b><br><i>orf19.4157</i>               | Peroxisomal 2,4-dienoyl-CoA<br>reductase                                                | Lipid<br>Utilization | Op                                     | Op              | Op             | 1.0                  | 1.7               | 3.0                | 1.0               | 5.2               | <b>2.9*</b>            | <b>5.2*</b>  | 0.6         |
| <b><i>NAG1</i></b><br><i>orf19.2156</i>                | Glucosamine-6-phosphate<br>deaminase                                                    | NAG<br>Utilization   | Op                                     |                 | Op             | 1.0                  | 4.2               | 17.7               | 1.0               | 10.6              | <b>17.4*</b>           | <b>10.6*</b> | <b>1.7*</b> |
| <b><i>DAC1</i></b><br><i>orf19.2157</i>                | N-acetylglucosamine-6-phosphate<br>(GlcNAcP) deacetylase                                | NAG<br>Utilization   |                                        | Op              | Op             | 1.2                  | 2.5               | 10.0               | 1.0               | 5.5               | <b>8.3*</b>            | <b>5.5*</b>  | <b>1.8*</b> |
| <b><i>HXK1</i></b><br><i>orf19.2154</i>                | N-acetylglucosamine (GlcNAc)<br>kinase                                                  | NAG<br>Utilization   |                                        |                 | Op             | 1.0                  | 1.5               | 2.1                | 1.0               | 2.2               | <b>2.1*</b>            | <b>2.2*</b>  | 0.9         |

**UPREGULATED IN OPAQUE ONLY (VS. WH CONTROLS)**

|                                  |                                     |                     |    |    |    |     |     |     |     |      |     |              |             |
|----------------------------------|-------------------------------------|---------------------|----|----|----|-----|-----|-----|-----|------|-----|--------------|-------------|
| <b>SAP2</b><br><i>orf19.3708</i> | Secreted aspartyl proteinase        | Protein Utilization |    | Op | Wh | 1.2 | 1.2 | 1.3 | 1.0 | 4.4  | 1.1 | <b>4.4*</b>  | <b>0.3*</b> |
| <b>SAP3</b><br><i>orf19.6001</i> | Secreted aspartyl proteinase        | Protein Utilization | Op | Op |    | 1.0 | 1.2 | 1.1 | 1.0 | 2.5  | 1.1 | <b>2.4*</b>  | <b>0.5*</b> |
| <b>SAP4</b><br><i>orf19.5716</i> | Secreted aspartyl proteinase        | Protein Utilization |    | Op |    | 1.3 | 1.7 | 1.7 | 1.0 | 11.9 | 1.3 | <b>11.9*</b> | <b>0.1*</b> |
| <b>SAP6</b><br><i>orf19.5542</i> | Secreted aspartyl proteinase        | Protein Utilization |    |    | Wh | 1.5 | 1.7 | 1.6 | 1.0 | 12.0 | 1.1 | <b>12.0*</b> | <b>0.1*</b> |
| <b>SAP7</b> <i>orf19.756</i>     | Secreted aspartyl proteinase        | Protein Utilization |    |    |    | 1.9 | 4.5 | 1.0 | 1.9 | 5.5  | 0.5 | <b>2.9*</b>  | <b>0.2*</b> |
| <b>SAP99</b><br><i>orf19.853</i> | Putative secreted aspartyl protease | Protein Utilization | Op |    | Op | 1.1 | 1.3 | 1.4 | 1.0 | 7.3  | 1.3 | <b>7.3*</b>  | <b>0.2*</b> |

**DOWNREGULATED IN GUT AND OPAQUE (VS. WH CONTROLS)**

|                                  |                                                                                                                              |          |  |    |    |    |      |      |     |      |     |             |             |            |
|----------------------------------|------------------------------------------------------------------------------------------------------------------------------|----------|--|----|----|----|------|------|-----|------|-----|-------------|-------------|------------|
| <b>ALS2</b><br><i>orf19.1097</i> | ALS family protein with roles in adhesion, biofilm formation, germ tube induction                                            | Adhesion |  | Wh |    | Wh | 5.5  | 1.4  | 1.0 | 4.6  | 1.0 | <b>0.2*</b> | <b>0.2*</b> | 1.0        |
| <b>ADH1</b><br><i>orf19.3997</i> | Alcohol dehydrogenase                                                                                                        | Adhesion |  |    |    | Wh | 20.9 | 4.7  | 1.0 | 21.7 | 2.6 | <b>0.0*</b> | <b>0.1*</b> | <b>0.4</b> |
| <i>orf19.4216</i>                | <i>Putative heat shock protein</i>                                                                                           | Adhesion |  |    |    | Wh | 37.1 | 28.2 | 3.1 | 38.9 | 1.0 | <b>0.1*</b> | <b>0.0*</b> | <b>3.1</b> |
| <b>CSH1</b><br><i>orf19.4477</i> | Aldo-keto reductase family member with role in fibronectin adhesion                                                          | Adhesion |  |    |    | Wh | 2.2  | 2.0  | 1.0 | 2.4  | 1.0 | <b>0.5*</b> | <b>0.4*</b> | 1.0        |
| <b>ALS4</b><br><i>orf19.4555</i> | ALS family protein with roles in adhesion and germ tube induction                                                            | Adhesion |  | Wh | Wh | Wh | 8.4  | 2.0  | 1.0 | 7.6  | 1.2 | <b>0.1*</b> | <b>0.2*</b> | 0.8        |
| <b>EFG1</b><br><i>orf19.610</i>  | Transcriptional repressor required for white-phase cell type, hyphal growth, metabolism with roles in adhesion and virulence | Adhesion |  | Wh | Wh | Wh | 5.3  | 2.0  | 1.1 | 4.8  | 1.0 | <b>0.2*</b> | <b>0.2*</b> | 1.1        |

**DOWNREGULATED IN GUT ONLY (VS. WH CONTROLS)**

|                                   |                                                                                 |                     |           |           |           |      |     |     |      |     |             |             |             |
|-----------------------------------|---------------------------------------------------------------------------------|---------------------|-----------|-----------|-----------|------|-----|-----|------|-----|-------------|-------------|-------------|
| <b>FRE10</b><br><i>orf19.1415</i> | Major cell-surface ferric reductase                                             | Iron uptake         |           |           | <b>Wh</b> | 11.0 | 5.1 | 1.0 | 9.6  | 2.9 | <b>0.1*</b> | <b>0.3*</b> | <b>0.3*</b> |
| <b>CFL4</b><br><i>orf19.1932</i>  | Putative ferric reductase                                                       | Iron uptake         |           |           | <b>Wh</b> | 7.0  | 2.0 | 1.0 | 9.1  | 2.0 | <b>0.1*</b> | <b>0.2</b>  | <b>0.5</b>  |
| <b>SIT1</b><br><i>orf19.2179</i>  | Transporter of ferrichrome siderophores                                         | Iron uptake         |           | <b>Wh</b> |           | 2.1  | 1.9 | 1.0 | 1.9  | 1.6 | <b>0.5*</b> | <b>0.8</b>  | <b>0.6</b>  |
| <b>FET34</b><br><i>orf19.4215</i> | Putative multicopper ferroxidase                                                | Iron uptake         | <b>Wh</b> |           | <b>Wh</b> | 29.0 | 2.1 | 1.0 | 23.7 | 1.3 | <b>0.0*</b> | <b>0.1</b>  | <b>0.8</b>  |
| <b>FTH1</b><br><i>orf19.4802</i>  | Protein similar to <i>S. cerevisiae</i> Fth1p, a high affinity iron transporter | Iron uptake         |           |           | <b>Wh</b> | 2.1  | 1.2 | 1.0 | 2.0  | 1.4 | <b>0.5*</b> | <b>0.7</b>  | <b>0.7</b>  |
| <b>FTR1</b><br><i>orf19.7219</i>  | High-affinity iron permease                                                     | Iron uptake         |           |           | <b>Wh</b> | 7.1  | 1.9 | 1.0 | 6.2  | 1.8 | <b>0.1*</b> | <b>0.3*</b> | <b>0.5*</b> |
| <b>FTR2</b><br><i>orf19.7231</i>  | High-affinity iron permease                                                     | Iron uptake         |           |           | <b>Op</b> | 2.8  | 1.3 | 1.0 | 2.4  | 1.5 | <b>0.4*</b> | <b>0.6</b>  | <b>0.7*</b> |
| <b>PDC11</b><br><i>orf19.2877</i> | Putative pyruvate decarboxylase                                                 | Glucose Utilization |           |           |           | 10.1 | 3.9 | 1.0 | 7.0  | 1.9 | <b>0.1*</b> | <b>0.3</b>  | <b>0.5</b>  |
| <b>PGK1</b><br><i>orf19.3651</i>  | Phosphoglycerate kinase                                                         | Glucose Utilization |           | <b>Wh</b> |           | 2.1  | 1.6 | 1.0 | 1.8  | 1.6 | <b>0.5*</b> | <b>0.9</b>  | <b>0.6*</b> |
| <b>PFK1</b><br><i>orf19.3967</i>  | Phosphofructokinase alpha subunit                                               | Glucose Utilization |           | <b>Wh</b> |           | 2.1  | 1.5 | 1.0 | 2.0  | 1.5 | <b>0.5*</b> | <b>0.8</b>  | <b>0.7*</b> |
| <b>ADH1</b><br><i>orf19.3997</i>  | Alcohol dehydrogenase                                                           | Glucose Utilization |           |           | <b>Wh</b> | 20.9 | 4.7 | 1.0 | 21.7 | 2.6 | <b>0.0*</b> | <b>0.1*</b> | <b>0.4</b>  |
| <b>FBA1</b><br><i>orf19.4618</i>  | Putative fructose-bisphosphate aldolase                                         | Glucose Utilization |           | <b>Wh</b> |           | 2.2  | 1.4 | 1.0 | 1.7  | 1.4 | <b>0.5*</b> | <b>0.9</b>  | <b>0.7</b>  |
| <b>ADH2</b><br><i>orf19.5113</i>  | Alcohol dehydrogenase                                                           | Glucose Utilization | <b>Op</b> | <b>Wh</b> | <b>Op</b> | 11.8 | 3.1 | 1.0 | 9.6  | 2.6 | <b>0.1*</b> | <b>0.3*</b> | <b>0.4</b>  |
| <b>HXK2</b><br><i>orf19.542</i>   | Hexokinase II                                                                   | Glucose Utilization |           | <b>Wh</b> |           | 2.1  | 1.5 | 1.0 | 1.9  | 1.6 | <b>0.5*</b> | <b>0.8</b>  | <b>0.6*</b> |

**HIGHER IN OPAQUE THAN GUT (DIRECT COMPARISON, IN ADDITION TO SAP GENES)**

|                                     |                                                               |        |  |  |  |           |     |     |     |      |      |     |             |             |
|-------------------------------------|---------------------------------------------------------------|--------|--|--|--|-----------|-----|-----|-----|------|------|-----|-------------|-------------|
| <b>STE4</b><br><i>orf19.799</i>     | Beta subunit of heterotrimeric G protein required for mating  | Mating |  |  |  | <b>Op</b> | 1.2 | 1.5 | 1.0 | 3.7  | 15.9 | 0.9 | <b>4.3*</b> | <b>0.1*</b> |
| <b>CAG1</b><br><i>orf19.4015</i>    | Alpha subunit of heterotrimeric G protein required for mating | Mating |  |  |  |           | 1.0 | 1.3 | 1.2 | 14.2 | 20.7 | 1.2 | 1.5         | <b>0.1*</b> |
| <b>STE18</b><br><i>orf19.6551.1</i> | Gamma subunit of heterotrimeric G protein involved in mating  | Mating |  |  |  |           | 1.0 | 1.1 | 1.7 | 12.1 | 15.2 | 1.7 | 1.3         | <b>0.1*</b> |
| <b>STE2</b><br><i>orf19.696</i>     | Receptor for alpha factor mating pheromone                    | Mating |  |  |  |           | 1.1 | 1.2 | 1.0 | 3.7  | 4.0  | 0.9 | 1.1         | <b>0.2*</b> |

**HIGHER IN GUT THAN OPAQUE**

|                                  |                                                                  |                       |           |           |           |           |      |     |      |      |     |              |             |             |
|----------------------------------|------------------------------------------------------------------|-----------------------|-----------|-----------|-----------|-----------|------|-----|------|------|-----|--------------|-------------|-------------|
| <b>GIT2</b><br><i>orf19.1978</i> | glycerophosphoinositol permease                                  | Phosphate transport   |           |           |           | <b>Wh</b> | 3.6  | 2.9 | 2.2  | 4.3  | 1.0 | <b>0.6*</b>  | <b>0.2*</b> | <b>2.2*</b> |
| <b>GIT3</b><br><i>orf19.1979</i> | Putative glycerophosphoinositol permease                         | Phosphate transport   | <b>Wh</b> | <b>Wh</b> | <b>Wh</b> |           | 28.1 | 8.0 | 2.8  | 26.7 | 1.0 | <b>0.1*</b>  | <b>0.0*</b> | <b>2.8*</b> |
| <b>PHO84</b><br><i>orf19.655</i> | High-affinity phosphate transporter                              | Phosphate transport   | <b>Op</b> |           |           | <b>Op</b> | 1.3  | 4.7 | 14.4 | 1.0  | 4.2 | <b>10.7*</b> | <b>4.2*</b> | <b>3.5*</b> |
| <i>orf19.6888</i>                | Putative transcription factor with Gal4p-like DNA-binding domain | Transcription Factor  |           |           |           | <b>Wh</b> | 2.0  | 1.9 | 2.9  | 1.9  | 1.0 | 1.5          | <b>0.5*</b> | <b>2.9*</b> |
| <i>orf19.4914</i>                | Putative transcription factor                                    | Transcription Factor  |           |           |           | <b>Wh</b> | 2.1  | 1.8 | 2.8  | 2.2  | 1.0 | 1.3          | <b>0.5*</b> | <b>2.8*</b> |
| <b>LEU3</b><br><i>orf19.4225</i> | Putative transcription factor with zinc-finger domain            | Transcription Factor  |           |           |           |           | 3.8  | 3.4 | 3.2  | 1.1  | 1.0 | 0.8          | 0.9         | <b>3.2*</b> |
| <i>orf19.2726</i>                | Putative plasma membrane protein                                 | Cell Wall or Secreted | <b>Wh</b> | <b>Wh</b> | <b>Wh</b> |           | 10.2 | 6.6 | 4.3  | 9.2  | 1.0 | <b>0.4*</b>  | <b>0.1*</b> | <b>4.3*</b> |
| <i>orf19.5070</i>                | Putative cell-wall mannoprotein                                  | Cell Wall or Secreted | <b>Wh</b> |           |           |           | 1.8  | 2.0 | 3.0  | 1.7  | 1.0 | <b>1.7*</b>  | 0.6         | <b>3.0*</b> |
| <i>orf19.1258</i>                | Putative adhesin-like protein                                    | Cell Wall or Secreted | <b>Wh</b> | <b>Wh</b> | <b>Wh</b> |           | 6.3  | 6.9 | 2.9  | 6.5  | 1.0 | <b>0.5*</b>  | <b>0.2*</b> | <b>2.9*</b> |
| <b>RBT4</b><br><i>orf19.6202</i> | Putative secreted protein that is required for virulence         | Cell Wall or Secreted |           |           |           | <b>Wh</b> | 7.1  | 3.8 | 2.7  | 6.7  | 1.0 | <b>0.4*</b>  | <b>0.1*</b> | <b>2.7*</b> |

|                                  |                                                               |                       |           |           |           |     |     |     |     |     |             |             |             |
|----------------------------------|---------------------------------------------------------------|-----------------------|-----------|-----------|-----------|-----|-----|-----|-----|-----|-------------|-------------|-------------|
| <b>RBE1</b><br><i>orf19.7218</i> | Cell wall protein                                             | Cell Wall or Secreted |           |           |           | 1.3 | 1.6 | 2.4 | 1.1 | 1.0 | <b>1.9*</b> | 0.9         | <b>2.4*</b> |
| <i>orf19.5267</i>                | Putative cell wall adhesin-like protein                       | Cell Wall or Secreted |           |           | <b>Op</b> | 1.2 | 1.3 | 5.6 | 1.0 | 2.2 | <b>4.9*</b> | <b>2.2*</b> | <b>2.6*</b> |
| <b>RHD1</b><br><i>orf19.54</i>   | Putative beta-mannosyltransferase                             | Cell Wall Structure   | <b>Wh</b> | <b>Wh</b> | <b>Wh</b> | 7.1 | 4.0 | 4.8 | 6.5 | 1.0 | 0.7         | <b>0.2*</b> | <b>4.8*</b> |
| <b>CIS2</b><br><i>orf19.6053</i> | Putative role in regulation of biogenesis of the cell wall    | Cell Wall Structure   |           |           | <b>Wh</b> | 2.3 | 1.9 | 2.4 | 2.4 | 1.0 | 1.1         | <b>0.4*</b> | <b>2.4*</b> |
| <b>SKN2</b> <i>orf19.348</i>     | Protein with a potential role in beta-1,6 glucan biosynthesis | Cell Wall Structure   |           |           | <b>Wh</b> | 2.5 | 1.6 | 2.4 | 2.9 | 1.0 | 1.0         | <b>0.3*</b> | <b>2.4*</b> |

Descriptions of published white (w) and opaque (o) gene sets refer to: <sup>28</sup> Lan et al. (2002) PNAS 23: 14902-12; <sup>43</sup> Tsong et al. (2003) Cell 115: 389-99; <sup>44</sup> Tuch et al. (2010) PLoS Genetics 6: e1001070



**Supplementary Table 5. Strains Used in this Study**

| Strain | Nickname                                    | MTL genotype  | Phase  | Full Genotype                                                                                                    | Parent    | Reference                     |
|--------|---------------------------------------------|---------------|--------|------------------------------------------------------------------------------------------------------------------|-----------|-------------------------------|
| SN78   | Wild type                                   | <i>MTLa/α</i> | white  | <i>leu2Δ/leu2Δ, ura3Δ/ura3Δ, his1Δ/his1Δ, iro1Δ/iro1Δ, MTLa/MTLα</i>                                             | RM1000 #2 | 14                            |
| SN87   | Wild type                                   | <i>MTLa/α</i> | white  | <i>leu2Δ/leu2Δ, ura3Δ/URA3, his1Δ/his1Δ, iro1Δ/IRO1, MTLa/MTLα</i>                                               | RM1000 #2 | 14                            |
| SN152  | Wild type                                   | <i>MTLa/α</i> | white  | <i>leu2Δ/leu2Δ, ura3Δ/URA3, his1Δ/his1Δ, arg4Δ/arg4Δ, iro1Δ/IRO1, MTLa/MTLα</i>                                  | RM1000 #2 | 14                            |
| SN235  | Wild type                                   | <i>MTLa/α</i> | white  | <i>leu2Δ::C.d.HIS1/leu2Δ, ura3Δ/URA3, his1Δ/his1Δ, arg4Δ/arg4Δ, iro1Δ/IRO1, MTLa/MTLα</i>                        | SN152     | This study                    |
| SN250  | Wild type                                   | <i>MTLa/α</i> | white  | <i>leu2Δ::C.m.LEU2/leu2Δ::C.d.HIS1, ura3Δ/URA3, his1Δ/his1Δ, arg4Δ/arg4Δ, iro1Δ/IRO1, MTLa/MTLα</i>              | SN152     | 42                            |
| SN425  | Wild type                                   | <i>MTLa/α</i> | white  | <i>leu2Δ::C.d.HIS1/leu2Δ::C.m.LEU2, ura3Δ/URA3, his1Δ/his1Δ, arg4Δ/arg4Δ::C.d.ARG4, iro1Δ/IRO1, MTLa/MTLα</i>    | SN152     | 42                            |
| QMY23  | Wild type                                   | <i>MTLa/α</i> | white  | <i>leu2Δ::C.m.LEU2/leu2Δ::C.d.HIS1, ura3Δ/URA3, his1Δ/his1Δ, iro1Δ/IRO1, MTLa/MTLα</i>                           | SN87      | 39                            |
| SN1011 | <i>efg1Δ/Δ</i>                              | <i>MTLa/α</i> | white  | <i>efg1Δ::C.m.LEU2/efg1Δ::C.d.HIS1, leu2Δ/leu2Δ, ura3Δ/URA3, his1Δ/his1Δ, arg4Δ/arg4Δ, iro1Δ/IRO1, MTLa/MTLα</i> | SN152     | 14                            |
| SN999  | <i>wor1Δ/ WOR1</i>                          | <i>MTLa/α</i> | white  | <i>WOR1/wor1Δ::C.d.HIS1, leu2Δ/leu2Δ, ura3Δ/URA3, his1Δ/his1Δ, arg4Δ/arg4Δ, iro1Δ/IRO1, MTLa/MTLα</i>            | SN152     | This study                    |
| SN881  | <i>wor1Δ/Δ</i>                              | <i>MTLa/α</i> | white  | <i>wor1Δ::C.m.LEU2/wor1Δ::C.d.HIS1, leu2Δ/leu2Δ, ura3Δ/URA3, his1Δ/his1Δ, arg4Δ/arg4Δ, iro1Δ/IRO1, MTLa/MTLα</i> | SN152     | This study                    |
| RZY244 | <i>wor1Δ/Δ</i>                              | <i>MTLa/α</i> | white  | <i>wor1Δ::C.m.LEU2/wor1Δ::C.d.HIS1, leu2Δ/leu2Δ, ura3Δ/URA3, his1Δ/his1Δ, iro1Δ/IRO1, MTLa/MTLα</i>              | SN87      | Zordan & Johnson, unpublished |
| SN1064 | <i>wor1Δ/Δ</i>                              | <i>MTLa/α</i> | white  | <i>wor1Δ::C.m.LEU2/wor1Δ::C.d.HIS1, leu2Δ/leu2Δ, ura3Δ/URA3, his1Δ/his1Δ, arg4Δ/ARG4, iro1Δ/IRO1, MTLa/MTLα</i>  | SN152     | This study                    |
| SN1014 | <i>WOR1<sub>prom</sub>-FLP</i> intermediate | <i>MTLa/α</i> | white  | <i>wor1Δ::FLP-SAT1/WOR1, leu2Δ/leu2Δ, ura3Δ/ura3Δ, his1Δ/his1Δ, iro1Δ/iro1Δ, MTLa/MTLα</i>                       | SN78      | This study                    |
| SN1020 | <i>WOR1<sub>prom</sub>-FLP</i>              | <i>MTLa/α</i> | white  | <i>wor1Δ::FLP-SAT1/WOR1, leu2Δ::FRT-URA3-FRT/leu2Δ, ura3Δ/ura3Δ, his1Δ/his1Δ, iro1Δ/iro1Δ, MTLa/MTLα</i>         | SN1014    | This study                    |
| SN967* | <i>MTLa</i> opaque                          | <i>MTLa/a</i> | opaque | <i>leu2Δ::C.m.LEU2/leu2Δ::C.d.HIS1, ura3Δ/URA3, his1Δ/his1Δ, iro1Δ/IRO1, MTLa/MTLa</i>                           | QMY23     | 35                            |
| SN966  | <i>MTLa</i>                                 | <i>MTLa/a</i> | white  | <i>leu2Δ::C.m.LEU2/leu2Δ::C.d.HIS1, ura3Δ/URA3, his1Δ/his1Δ, iro1Δ/IRO1, MTLa/MTLa</i>                           | SN967     | This study                    |
| SN1008 | <i>MTLα</i> opaque                          | <i>MTLΔ/α</i> | opaque | <i>leu2Δ/leu2Δ::SAT1, ura3Δ/URA3, his1Δ/his1Δ, arg4Δ/arg4Δ, iro1Δ/IRO1,</i>                                      | SN152     | This study                    |

|        |                                              |               |        |                                                                                                                                                               |        |            |
|--------|----------------------------------------------|---------------|--------|---------------------------------------------------------------------------------------------------------------------------------------------------------------|--------|------------|
|        |                                              |               |        | <i>mtlaΔ::C.d.HIS1/MTLα</i>                                                                                                                                   |        |            |
| SN1038 | <i>MTLa</i> opaque                           | <i>MTLa/Δ</i> | opaque | <i>leu2Δ/leu2Δ, ura3Δ/URA3, his1Δ/his1Δ, arg4Δ/arg4Δ, iro1Δ/IRO1, MTLa/mtlαΔ::C.d.ARG4</i>                                                                    | SN152  | This study |
| SN927  | <i>WOR1<sup>OE</sup>/WOR1</i>                | <i>MTLa/α</i> | white  | <i>SAT1-TDH3<sub>prom</sub><sup>-</sup>WOR1/WOR1, leu2Δ::C.m.LEU2/leu2Δ::C.d.HIS1, ura3Δ/URA3, his1Δ/his1Δ, arg4Δ/arg4, Δiro1Δ/IRO1, MTLa/MTLα</i>            | SN250  | This study |
| SN928  | <i>WOR1<sup>OE</sup></i>                     | <i>MTLa/α</i> | white  | <i>SAT1-TDH3<sub>prom</sub><sup>-</sup>WOR1/wor1Δ::C.d.ARG4, leu2Δ::C.m.LEU2/leu2Δ::C.d.HIS1, ura3Δ/URA3, his1Δ/his1Δ, arg4Δ/arg4Δ, iro1Δ/IRO1, MTLa/MTLα</i> | SN927  | This study |
| SN1001 | <i>WOR1<sup>OE</sup></i>                     | <i>MTLa/α</i> | white  | <i>SAT1-TDH3<sub>prom</sub><sup>-</sup>WOR1/wor1Δ::C.d.HIS1, leu2Δ/leu2Δ, ura3Δ/URA3, his1Δ/his1Δ, iro1Δ/IRO1, MTLa/MTLα</i>                                  | SN999  | This study |
| SN1044 | <i>WOR1<sup>OE</sup></i><br>(post-mouse)     | <i>MTLa/α</i> | white  | <i>SAT1-TDH3<sub>prom</sub><sup>-</sup>WOR1/wor1Δ::C.d.ARG4, leu2Δ::C.m.LEU2/leu2Δ::C.d.HIS1, ura3Δ/URA3, his1Δ/his1Δ, arg4Δ/arg4Δ, iro1Δ/IRO1, MTLa/MTLα</i> | SN928  | This study |
| SN1045 | <i>WOR1<sup>OE</sup></i> GUT<br>(post-mouse) | <i>MTLa/α</i> | GUT    | <i>SAT1-TDH3<sub>prom</sub><sup>-</sup>WOR1/wor1Δ::C.d.ARG4, leu2Δ::C.m.LEU2/leu2Δ::C.d.HIS1, ura3Δ/URA3, his1Δ/his1Δ, arg4Δ/arg4Δ, iro1Δ/IRO1, MTLa/MTLα</i> | SN928  | This study |
| SN1046 | <i>WOR1<sup>OE</sup></i> GUT<br>(post-mouse) | <i>MTLa/α</i> | GUT    | <i>SAT1-TDH3<sub>prom</sub><sup>-</sup>WOR1/wor1Δ::C.d.HIS1, leu2Δ/leu2Δ, ura3Δ/URA3, his1Δ/his1Δ, iro1Δ/IRO1, MTLa/MTLα</i>                                  | SN1001 | This study |

*C.d. ARG4* denotes *Candida dubliniensis ARG4*, *C.d. HIS1* denotes *Candida dubliniensis HIS1*, and *C.m. LEU2* denotes *Candida maltosa LEU2*.

\* SN967 was constructed by Mitrovich et al.<sup>35</sup> but was not assigned a unique name to distinguish it from its *MTLa/α* parent (QMY23).

**Supplementary Table 6. Plasmids Used in this Study**

| <b>Plasmid</b> | <b>Insert</b>                                                                                                                                                  | <b>Use</b>                                                                            | <b>Selectable Markers</b>        | <b>Vector</b> |
|----------------|----------------------------------------------------------------------------------------------------------------------------------------------------------------|---------------------------------------------------------------------------------------|----------------------------------|---------------|
| pSN209         | <i>PmeI</i> -sequence ending 120 bp upstream of <i>WOR1</i> ORF- <i>SAT1</i> gene- <i>TDH3</i> promoter-1 <sup>st</sup> 300 bp of <i>WOR1</i> ORF- <i>PmeI</i> | Replacement of <i>WOR1</i> promoter with ( <i>SAT1</i> gene and) <i>TDH3</i> promoter | AmpR,<br><i>ScURA3</i> ,<br>NatR | pRS316        |
| pSN288         | <i>PmeI</i> -final 500 bp of <i>WOR1</i> promoter- <i>FLP</i> ORF- <i>SAT1</i> gene- <i>WOR1</i> downstream sequence- <i>PmeI</i>                              | Replacement of <i>WOR1</i> ORF with <i>FLP</i> ORF                                    | AmpR,<br><i>ScURA3</i> ,<br>NatR | pRS316        |
| pSN290         | <i>PmeI</i> - <i>LEU2</i> upstream sequence-FRT- <i>C. albicans URA3-FRT-LEU2</i> downstream sequence- <i>PmeI</i>                                             | Introduction of <i>FRT-URA3-FRT</i> at the <i>LEU2</i> locus                          | AmpR,<br><i>ScURA</i>            | pRS316        |

*PmeI* denotes the recognition sequence for this restriction enzyme; *ScURA3* denotes the *URA3* gene from *Saccharomyces cerevisiae*, AmpR denotes resistance to ampicillin, NatR denotes resistance to nourseothricin.

**Supplementary Table 7. Primers Used in this Study**

| Primer Name | Purpose                                                                                                                       | Sequence (5' to 3')                                               |
|-------------|-------------------------------------------------------------------------------------------------------------------------------|-------------------------------------------------------------------|
| SNO1122     | <i>wor1</i> -ko gene disruption primer 5' flank, forward (SN881 and SN1064)                                                   | TCCTGTATTGGTATTGGTGAG                                             |
| SNO1123     | <i>wor1</i> -ko gene disruption primer 5' flank, reverse (SN881 and SN1064)                                                   | CACGGCGCGCCTAGCAGCGGTAAGACAGATATT<br>GAAACTTCAC                   |
| SNO1124     | <i>wor1</i> -ko gene disruption primer 3' flank, forward (SN881 and SN1064)                                                   | GTCAGCGGCCGCATCCCTGCATCTTATATATGTG<br>GGTCTGTG                    |
| SNO1125     | <i>wor1</i> -ko gene disruption primer 3' flank, reverse (SN881 and SN1064)                                                   | TTCAGCTCTCTAAGTAGTATTG                                            |
| SNO1271     | Common primer for amplifying His, Leu and Arg cassettes, forward                                                              | CCGCTGCTAGGCGCGCCGTGACCAGTGTGATGG<br>ATATCTGC                     |
| SNO1272     | Common primer for amplifying His, Leu and Arg cassettes, reverse                                                              | GCAGGGATGCGGCCGCTGACAGCTCGGATCCA<br>CTAGTAACG                     |
| SNO1126     | <i>Wor1</i> ORF check primer, forward                                                                                         | GACGACGAGTACGACCACAA                                              |
| SNO1127     | <i>Wor1</i> ORF check primer, reverse                                                                                         | CAGCTTTCCCTTCCATGTGT                                              |
| SNO1128     | <i>Wor1</i> integration verification check left, forward                                                                      | TTTTCTTTCCAAAACCCTGCC                                             |
| SNO1129     | <i>Wor1</i> integration verification check right, reverse                                                                     | TCCCTTCATGAATAGTTTCCC                                             |
| SNO1130     | <i>C. dubliniensis HIS1</i> integration verification check left, reverse                                                      | ATTAGATACGTTGGTGGTTC                                              |
| SNO1131     | <i>C. dubliniensis HIS1</i> integration verification check right, forward                                                     | AACACAACCTGCACAATCTGG                                             |
| SNO1132     | <i>C. maltosa LEU2</i> integration verification check left, reverse                                                           | AGAATTCCCAACTTTGTCTG                                              |
| SNO1133     | <i>C. maltosa LEU2</i> integration verification check right, forward                                                          | AAACTTTGAACCCGGCTGCG                                              |
| SNO143      | <i>C. dubliniensis ARG4</i> integration on <i>C. albicans</i> ARG4 locus, 5' flank, forward                                   | GGACAGAAAGTTATTGTACAG                                             |
| SNO144      | <i>C. dubliniensis ARG4</i> integration on <i>C. albicans</i> ARG4 locus, 5' flank, reverse                                   | TCACGGCGCGCCTAGCAGCGGGATTATTCTTGA<br>TAGCTGTTATG                  |
| SNO1385     | <i>C. dubliniensis ARG4</i> integration on <i>C. albicans</i> ARG4 locus, ARG4 insert, forward                                | CCGCTGCTAGGCGCGCCGTGAAACGAATCAGAC<br>TCTGATACCCAGTGTGATGGATATCTGC |
| SNO241      | <i>C. dubliniensis ARG4</i> integration on <i>C. albicans</i> ARG4 locus, ARG4 insert, reverse                                | GCAGGGATGCGGCCGCTGACAGCTCGGATCCAC<br>TAGTAACG                     |
| SNO145      | <i>C. dubliniensis ARG4</i> integration on <i>C. albicans</i> ARG4 locus, 3' flank, forward                                   | GTCAGCGGCCGCATCCCTGCGTCATATAATAATC<br>ACAGTATTG                   |
| SNO146      | <i>C. dubliniensis ARG4</i> integration on <i>C. albicans</i> ARG4 locus, 3' flank, reverse                                   | TCAGACGATCTTTACAATGG                                              |
| SNO187      | <i>C. dubliniensis ARG4</i> integration verification check, left, forward                                                     | CAAGAGTAGTCTCAAATAAACC                                            |
| SNO263      | <i>C. dubliniensis ARG4</i> integration verification check, left, reverse, qPCR for <i>wor1ko</i> (SN1064), reverse           | TTCAACCTTTCAAACGATGC                                              |
| SNO264      | <i>C. dubliniensis ARG4</i> integration verification check right, forward                                                     | TCGATACATTTGCGGTACAG                                              |
| SNO188      | <i>C. dubliniensis ARG4</i> integration verification check, right, reverse                                                    | CGTTTGGAAAGCTGTATATCG                                             |
| SNO183      | qPCR for <i>SN425 WT</i> , <i>SN250 WT</i> and <i>QMY23 WT</i> , forward                                                      | GATGCCTTAGCTCATTCTTC                                              |
| SNO322      | Common qPCR primer for <i>SN425 WT</i> , <i>SN250 WT</i> , <i>SN235 WT</i> , <i>efg1ko</i> and <i>wor1ko</i> (SN881), reverse | TGAGCACCATAAGGACGTTT                                              |

|         |                                                                                                          |                                                                                               |
|---------|----------------------------------------------------------------------------------------------------------|-----------------------------------------------------------------------------------------------|
| SNO1003 | Common qPCR primer for <i>QMY23 WT</i> and <i>wor1ko</i> (RZY244), reverse                               | CCGGTTTACTTGGATCTTCG                                                                          |
| SNO1007 | qPCR for <i>wor1ko</i> (RZY244), forward                                                                 | GTACACTGACATCTCAAACATCAA                                                                      |
| ST49    | qPCR for <i>wor1ko</i> (SN1064), forward                                                                 | AACGAATCAGACTCTGATAC                                                                          |
| STO8    | qPCR for <i>efg1ko</i> , forward                                                                         | TTTTGTGGAGCCTTTCATGA                                                                          |
| STO2    | qPCR for <i>wor1ko</i> (SN881) and <i>wor1het</i> (SN999), forward                                       | AAGATTGGTTTCTGTGCGACA                                                                         |
| SNO1697 | qPCR for <i>wor1het</i> (SN999), reverse                                                                 | CGTAGCCATGAGCACCATAA                                                                          |
| SNO1134 | <i>WOR1</i> -OE and <i>WOR1p-FLP</i> strain construction; amplifies <i>WOR1</i> upstream region, forward | GGCGAATTGGAGCTCCACCGCGGTGGCGGCCG<br>CTCTAGAAGTAGTGGATCGTTTAAACCTTTCCAA<br>AACCTGCCTTT         |
| SNO1135 | <i>WOR1</i> -OE strain construction; amplifies <i>WOR1</i> upstream region, reverse                      | GGGACGAGGCAAGCTTGATTCTTTGATGTTTGAG<br>ATGTCAGTG                                               |
| SNO1136 | <i>WOR1</i> -OE strain construction; amplifies <i>SAT1</i> cassette, forward                             | CTGACATCTCAAACATCAAAGAATCAAGCTTGCC<br>TCGTCCCC                                                |
| SNO1137 | <i>WOR1</i> -OE strain construction; amplifies <i>SAT1</i> cassette, reverse                             | GACTATACTTGAATTAGACATATTTGAATTCAATT<br>GTGATG                                                 |
| SNO1138 | <i>WOR1</i> -OE strain construction; amplifies <i>WOR1</i> ORF fragment, forward                         | CATCACAATTGAATTCAAATATGTCTAATTC AAGT<br>ATAGTCC                                               |
| SNO1139 | <i>WOR1</i> -OE strain construction; amplifies <i>WOR1</i> ORF fragment, reverse                         | GTCGACGGTATCGATAAGCTTGATATCGAATTCC<br>TGCAGCCCCGGGGGATCGTTTAAACTTGTGGTGC<br>TACTCGTCGTCGGGACC |
| SNO1187 | <i>WOR1</i> -OE 5' integration verification check, forward                                               | CCTATTGTTATTGCAGCAACAG                                                                        |
| SNO1188 | <i>WOR1</i> -OE 5' integration verification check, reverse                                               | GTATTCTGGGCCTCCATGTC                                                                          |
| SNO1185 | <i>WOR1</i> -OE 3' integration verification check, forward                                               | AACCCTTGAAATTCCTTCA                                                                           |
| SNO1186 | <i>WOR1</i> -OE 3' integration verification check, reverse                                               | GTGGTTACCATACCACCAG                                                                           |
| SNO1342 | qPCR for <i>SN425 WT</i> , reverse                                                                       | TCAAACGAAGGTCACACTGACT                                                                        |
| SNO1343 | qPCR for <i>SN425 WT</i> , forward                                                                       | AACAGCTATCAAGAATAATCCCGC                                                                      |
| STO50   | alternate qPCR for <i>SN425 WT</i> , forward                                                             | TATGCAGAGAGATATACATC                                                                          |
| SNO1355 | qPCR for <i>WOR1-OE</i> , forward                                                                        | CCAATTTGAAGACCATTTACGC                                                                        |
| SNO1361 | qPCR for <i>WOR1-OE</i> , reverse                                                                        | GCACGTCAAGACTGTCAAGGAGG                                                                       |
| SNO1521 | qPCR for <i>SN967 WT</i> , forward                                                                       | TCTAGTGGTGAATTTGGGTTT                                                                         |
| SNO1522 | qPCR for <i>SN967 WT</i> , reverse                                                                       | TAAGTAGATGGAATAGATTTGATC                                                                      |
| SNO1008 | PCR check for the presence of <i>OBPa</i> , forward                                                      | GCATATTGCACCAAAGGCAG                                                                          |
| SNO1009 | PCR check for the presence of <i>OBPa</i> , reverse                                                      | GATTTCCATGACCTCGTTCC                                                                          |
| SNO1010 | PCR check for the presence of <i>OBPalpha</i> , forward                                                  | GAAGATGACTCAGGTCATGC                                                                          |
| SNO1011 | PCR check for the presence of <i>OBPalpha</i> , reverse                                                  | CTTCAATTGCATCGTAAGTACC                                                                        |
| SNO1531 | <i>WOR1p-FLP</i> strain construction; amplifies <i>WOR1</i> upstream region, reverse                     | CATAATATATCAAATTGTGGCATTGCTTAATATTG<br>AATTGAATTATAC                                          |
| SNO1532 | <i>WOR1p-FLP</i> strain construction; amplifies <i>FLP-SAT1</i> cassette, forward                        | GTATAATTC AATTCAATATTAAGCAATGCCACAAT<br>TTGATATATTATG                                         |
| SNO1533 | <i>WOR1p-FLP</i> strain construction; amplifies <i>FLP-SAT1</i> cassette, reverse                        | CCTGAATGAGCCCCAAAATAATAACAGGACCACC<br>TTTGATTGTAAA                                            |
| SNO1534 | <i>WOR1p-FLP</i> strain construction; amplifies ~450bp of <i>WOR1</i> 3'UTR, forward                     | TTTACAATCAAAGGTGGTCCTGTTATTATTTGGG<br>GCTCATTGAGG                                             |
| SNO1352 | <i>WOR1p-FLP</i> strain construction; amplifies ~450bp of <i>WOR1</i> 3'UTR, reverse                     | GTCGACGGTATCGATAAGCTTGATATCGAATTCC<br>TGCAGCCCCGGGGGATCGTTTAAACGTCAAGGCG<br>TCATCATATCATT     |
| SNO1535 | <i>WOR1p-FLP</i> strain verification check, left,                                                        | AGAAAGAAAGAGAGAGAGGGAACG                                                                      |

|         |                                                                                                 |                                                                                                 |
|---------|-------------------------------------------------------------------------------------------------|-------------------------------------------------------------------------------------------------|
|         | forward                                                                                         |                                                                                                 |
| SNO1536 | <i>WOR1p-FLP</i> strain verification check, left, reverse                                       | CTGTTCCGTTATGTGTAATCATCC                                                                        |
| SNO1537 | <i>WOR1p-FLP</i> strain verification check, right forward                                       | CGCCTAACATATGTGAAGTGTGA                                                                         |
| SNO1354 | <i>WOR1p-FLP</i> strain verification check, right, reverse                                      | CGTTCAGATATTCATACATCCACCT                                                                       |
| SNO464  | <i>Leu2-FRT-URA-FRT</i> strain construction; amplifies <i>Leu2</i> 5' flank, forward            | GGCGAATTGGAGCTCCACCGCGGTGGCGGCCG<br>CTCTAGAAGTAGTGGATCGTTTAACTTGGTAGA<br>TTTACAACGAAGCCG        |
| SNO1538 | <i>Leu2-FRT-URA-FRT</i> strain construction; amplifies <i>Leu2</i> 5' flank, reverse            | CAGTAGCTCGAGTTAAATCCGAAGTTCCTATTCT<br>CTAGAAAGTATAGGAACTTCCTCGAGGAAAAGG<br>GGAGTATTTCTGGAGTGAA  |
| SNO1539 | <i>Leu2-FRT-URA-FRT</i> strain construction; amplifies <i>C.a. URA3</i> cassette, forward       | AGAAATACTCCCCTTTTCTCGAGGAAGTTCCTA<br>TACTTTCTAGAGAATAGGAACTTCGGATTTAACTC<br>GAGCTACTGATATCAATGC |
| SNO1540 | <i>Leu2-FRT-URA-FRT</i> strain construction; amplifies <i>C.a. URA3</i> cassette, reverse       | GCTAACTACTGTATATACTGGGATCTGAAGTTCC<br>TATTCTCTAGAAAGTATAGGAACTTCCTGCTTAA<br>TCGATATAACTTGGTTTGA |
| SNO1541 | <i>Leu2-FRT-URA-FRT</i> strain construction; amplifies <i>Leu2</i> 3' flank, forward            | CAAGTTATATCGATTTAAGCAGGAAGTTCCTATA<br>CTTTCTAGAGAATAGGAACTTCAGATCCCAGTAT<br>ATACAGTAGTTAGCATTTA |
| SNO467  | <i>Leu2-FRT-URA-FRT</i> strain construction; amplifies <i>Leu2</i> 3' flank, reverse            | GTCGACGGTATCGATAAGCTTGATATCGAATTCC<br>TGCAGCCCCGGGGATCGTTTAACTCGAAAACG<br>ATGTTTGCACCACCG       |
| SNO1443 | <i>Leu2-FRT-URA-FRT</i> strain verification check, left. forward                                | GCTTTGAGTTCTGGGTCAGC                                                                            |
| SNO1547 | <i>Leu2-FRT-URA-FRT</i> strain verification check, left. reverse                                | GTTGACCGTATCAGTAGCATCATC                                                                        |
| SNO1447 | <i>Leu2-FRT-URA-FRT</i> strain verification check, right. reverse                               | CGCTACCCAACAAAGAGACC                                                                            |
| SNO1542 | <i>Leu2-FRT-URA-FRT</i> strain verification check, right. forward                               | GCAATCGAAGTAGCTGGGATA                                                                           |
| SNO509  | URA excision verification primer, and qPCR for <i>SN235 WT</i> , forward                        | GTTGTGATTTTGCTATTCCGGCGCT                                                                       |
| SNO840  | URA excision verification primer, reverse                                                       | TCTCTCCGAATGAAGAGCC                                                                             |
| SNO1650 | <i>Leu2</i> knockout verification primer for strains <i>SN78</i> and <i>SN1020</i> , forward    | GAAATGCTGGTTGGAATGCT                                                                            |
| SNO1652 | <i>Leu2</i> knockout verification primer for strains <i>SN78</i> and <i>SN1020</i> , reverse    | GCGGTCTAGAAGGACCACCT                                                                            |
| SNO819  | qRTPCR for <i>ACT1</i> ORF, forward                                                             | GTGGTACTACCATGTTCCCAGG                                                                          |
| SNO820  | qRTPCR for <i>ACT1</i> ORF, reverse                                                             | GATAGAACCACCAATCCAGACAGAG                                                                       |
| SNO1154 | qRTPCR for <i>WOR1</i> ORF, forward                                                             | TGCTGGTGGATCTAGTAGTGTAGC                                                                        |
| SNO1155 | qRTPCR for <i>WOR1</i> ORF, reverse                                                             | AGTACCGGTGTAATACGACCCAGA                                                                        |
| SNO1603 | qRTPCR for <i>TDH3</i> ORF, forward                                                             | GCTCCAGACTATGCTGCTTACAT                                                                         |
| SNO1604 | qRTPCR for <i>TDH3</i> ORF, reverse                                                             | GGAATGTTAGCTGGGTCTCTTTC                                                                         |
| SNO1332 | <i>MTLa-ko</i> gene disruption primer 3' flank, forward                                         | GGAATTATTGTCTAACCTGCCCGTGG                                                                      |
| SNO1333 | <i>MTLa-ko</i> gene disruption primer 3' flank, reverse                                         | CGTTACTAGTGGATCCGAGCTGCGGCCGCATAT<br>ACACTGGAAATAAGTGGTGGTAGT                                   |
| SNO1336 | <i>MTLa-ko</i> gene disruption primer 5' flank, forward                                         | TCAATCAGTTGCGGTGTGGCGGCCTATATGT<br>ACATACAAAACGGTTATTGTAGCAGG                                   |
| SNO1335 | <i>MTLa-ko</i> gene disruption primer 5' flank, reverse                                         | CCCTTGGGTAGTAAAGGTAAAGCCAATGCCG                                                                 |
| SNO1315 | <i>MTLa-ko</i> gene disruption, primer to amplify <i>C. dubliniensis HIS1</i> cassette, forward | TATATGCGGCCGAGCTCGGATCCACTAGTAAC<br>G                                                           |

|         |                                                                                                  |                                                           |
|---------|--------------------------------------------------------------------------------------------------|-----------------------------------------------------------|
| SNO1318 | <i>MTLa</i> -ko gene disruption, primer to amplify <i>C. dubliniensis HIS1</i> cassette, reverse | ATATAGGCGCGCCACACCGCAACCTGATTGATAC<br>CAGTGTGATGGATATCTGC |
| SNO1337 | <i>MTLa</i> -ko 3' integration verification check, reverse                                       | GTTGGTGAACCTAAAGTACTTTATTGG                               |
| SNO1339 | <i>MTLa</i> -ko 3' integration verification check, forward                                       | AGTGGATCCGAGCTGCGGCCGCATATA                               |
| SNO1340 | <i>MTLa</i> -ko 5' integration verification check, forward                                       | TTGAGTGTTGCTGGTCTTGC                                      |
| SNO1341 | <i>MTLa</i> -ko 5' integration verification check, reverse                                       | TGCAGATATCCATCACACTGG                                     |
